# Supplementary material for: Solvent effect on the structures of three manganese complexes based on azotetrazole-3-hydroxy-2-naphthoic acid: synthesis, structures, and magnetic and fluorescent properties
Source: Royal Society of Chemistry journal article supplement (doi:10.1039/d3ce00678f), 2023-01-01
Supplement: d3ce00678f1.pdf [file d3ce00678f1.pdf]

## Electronic Supplementary Information

### **Solvent effect on the structures of three manganese complexes based on azotetrazolyl-3-hydroxy-2-naphthoic acid: syntheses, structures, magnetic and fluorescent properties**

Yun-Jing Zhong,<sup>§</sup> Zhi-Jian Ouyang,<sup>§</sup> Xiao-Man Kuang, You-Hong Li, Wen-Bin Chen,\* Meng Yang\* and Wen Dong\*

Guangzhou Key Laboratory for Environmentally Functional Materials and Technology, School of Chemistry and Chemical Engineering, Guangzhou University, Guangzhou 510006, P. R. China

## Contents of the Electronic Supplementary Information

|                                                                                                            |    |
|------------------------------------------------------------------------------------------------------------|----|
| Table S1 Selected bond lengths [ $\text{\AA}$ ] and angles [ $^\circ$ ] for complex <b>1</b> . .....       | 3  |
| Table S2 Selected bond lengths [ $\text{\AA}$ ] and angles [ $^\circ$ ] for complex <b>2</b> . .....       | 3  |
| Table S3 Selected bond lengths [ $\text{\AA}$ ] and angles [ $^\circ$ ] for complex <b>3</b> . .....       | 4  |
| Figure S1 Local coordination geometry of Mn(II) ion in complex <b>1</b> . .....                            | 6  |
| Table S4 SHAPE analysis for complex <b>1</b> . .....                                                       | 6  |
| Figure S2 Local coordination geometry of Mn(II) ions in complex <b>2</b> . .....                           | 6  |
| Table S5 SHAPE analysis for complex <b>2</b> . .....                                                       | 7  |
| Figure S3 Local coordination geometry of Mn(II) ions in complex <b>3</b> . .....                           | 7  |
| Table S6 SHAPE analysis for complex <b>3</b> . .....                                                       | 7  |
| Figure S4 the size of CH <sub>3</sub> OH, DMF and DMSO.....                                                | 8  |
| Figure S5 Powder X-ray diffraction (PXRD) patterns for complexes <b>1-3</b> . .....                        | 8  |
| Figure S6 TG curves of complex <b>1</b> under N <sub>2</sub> atmosphere. ....                              | 9  |
| Figure S7 <i>M</i> versus <i>H</i> plot at 2 K for complex <b>2</b> . .....                                | 9  |
| Figure S8 Temperature dependence of the in-phase and out-phase in zero field for complex <b>2</b> . .....  | 9  |
| Figure S9 <i>M</i> versus <i>H</i> plot at 2 K for complex <b>3</b> . .....                                | 10 |
| Figure S10 Temperature dependence of the in-phase and out-phase in zero field for complex <b>3</b> . ..... | 10 |
| Figure S11 Magnetic exchange pathways in complexes <b>1-3</b> . ....                                       | 11 |

**Table S1** Selected bond lengths [Å] and angles [°] for complex **1**.

| <i>Bond distances</i> |            |                  |            |
|-----------------------|------------|------------------|------------|
| Mn(1)–N(1)            | 2.085(2)   | Mn(1)–N(2)       | 2.103(2)   |
| Mn(1)–N(3a)           | 2.100(2)   | Mn(1)–O(1)       | 2.0554(18) |
| Mn(1)–O(2)            | 2.0881(17) | Mn(1)–O(3)       | 2.1397(19) |
| <i>Angles</i>         |            |                  |            |
| N(1)–Mn(1)–N(2)       | 75.45(8)   | N(1)–Mn(1)–N(3a) | 100.47(8)  |
| N(1)–Mn(1)–O(1)       | 153.53(8)  | N(1)–Mn(1)–O(2)  | 92.32(8)   |
| N(1)–Mn(1)–O(3)       | 92.20(8)   | N(2)–Mn(1)–N(3a) | 175.81(8)  |
| N(2)–Mn(1)–O(1)       | 78.20(8)   | N(2)–Mn(1)–O(2)  | 88.02(8)   |
| N(2)–Mn(1)–O(3)       | 88.10(8)   | N(3a)–Mn(1)–O(1) | 105.91(8)  |
| N(3a)–Mn(1)–O(2)      | 91.18(8)   | N(3i)–Mn(1)–O(3) | 93.10(8)   |
| O(1)–Mn(1)–O(2)       | 89.34(7)   | O(1)–Mn(1)–O(3)  | 84.31(7)   |
| O(2)–Mn(1)–O(3)       | 173.12(7)  |                  |            |

<sup>a</sup> 1-x, 1-y, -z**Table S2** Selected bond lengths [Å] and angles [°] for complex **2**.

| <i>Bond distances</i> |            |                  |            |
|-----------------------|------------|------------------|------------|
| Mn(1)–N(1)            | 2.311(3)   | Mn(1)–N(2)       | 2.430(3)   |
| Mn(1)–O(1)            | 2.230(3)   | Mn(1)–O(1a)      | 2.252(2)   |
| Mn(1)–O(2)            | 2.181(3)   | Mn(1)–O(3)       | 2.161(3)   |
| Mn(1)–O(4a)           | 2.242(2)   | Mn(2)–N(3)       | 2.153(3)   |
| Mn(2)–N(3c)           | 2.153(3)   | Mn(2)–O(4a)      | 2.241(2)   |
| Mn(2)–O(4b)           | 2.241(2)   | Mn(2)–O(5a)      | 2.199(3)   |
| Mn(2)–O(5b)           | 2.199(3)   |                  |            |
| <i>Angles</i>         |            |                  |            |
| N(1)–Mn(1)–N(2)       | 65.35(10)  | N(1)–Mn(1)–O(1a) | 147.89(10) |
| N(1)–Mn(1)–O(1)       | 132.96(10) | N(1)–Mn(1)–O(2)  | 88.68(11)  |

|                   |            |                   |            |
|-------------------|------------|-------------------|------------|
| N(1)-Mn(1)-O(3)   | 93.24(13)  | N(1)-Mn(1)-O(4a)  | 146.41(10) |
| N(2)-Mn(1)-O(1)   | 67.96(9)   | N(2)-Mn(1)-O(1a)  | 86.71(9)   |
| N(2)-Mn(1)-O(2)   | 91.49(11)  | N(2)-Mn(1)-O(3)   | 86.11(12)  |
| N(2)-Mn(1)-O(4a)  | 137.40(10) | O(1)-Mn(1)-O(1a)  | 79.15(9)   |
| O(1)-Mn(1)-O(2)   | 87.09(10)  | O(1)-Mn(1)-O(3)   | 89.02(12)  |
| O(1)-Mn(1)-O(4a)  | 154.61(9)  | O(1a)-Mn(1)-O(2)  | 93.55(10)  |
| O(1a)-Mn(1)-O(3)  | 86.70(12)  | O(1a)-Mn(1)-O(4a) | 75.80(9)   |
| O(2)-Mn(1)-O(3)   | 175.98(12) | O(2)-Mn(1)-O(4a)  | 90.38(10)  |
| O(3)-Mn(1)-O(4a)  | 93.57(12)  | N(3)-Mn(2)-N(3c)  | 91.50(19)  |
| N(3)-Mn(2)-O(4a)  | 82.09(11)  | N(3)-Mn(2)-O(4b)  | 123.83(11) |
| N(3)-Mn(2)-O(5a)  | 138.87(11) | N(3)-Mn(2)-O(5b)  | 99.64(12)  |
| N(3c)-Mn(2)-O(4a) | 123.83(11) | N(3c)-Mn(2)-O(4b) | 82.09(11)  |
| N(3c)-Mn(2)-O(5a) | 99.64(12)  | N(3c)-Mn(2)-O(5b) | 138.87(11) |
| O(4a)-Mn(2)-O(4b) | 145.05(14) | O(4a)-Mn(2)-O(5a) | 58.81(9)   |
| O(4a)-Mn(2)-O(5b) | 96.99(10)  | O(4b)-Mn(2)-O(5a) | 96.99(10)  |
| O(4b)-Mn(2)-O(5b) | 58.81(9)   | O(5a)-Mn(2)-O(5b) | 97.44(16)  |

<sup>a</sup>1/2-x, 1/2-y, 1-z; <sup>b</sup>1/2+x, 1/2-y, 1/2+z; <sup>c</sup>1-x, +y, 3/2-z

**Table S3** Selected bond lengths [Å] and angles [°] for complex **3**.

| <i>Bond distances</i> |          |             |          |
|-----------------------|----------|-------------|----------|
| Mn(1)-O(1)            | 2.292(3) | Mn(1)-O(2)  | 2.189(4) |
| Mn(1)-O(3)            | 2.183(4) | Mn(1)-O(4)  | 2.169(4) |
| Mn(1)-O(1b)           | 2.235(3) | Mn(1)-N(1b) | 2.332(4) |
| Mn(1)-N(6b)           | 2.408(4) | Mn(2)-O(4)  | 2.443(4) |
| Mn(2)-O(5)            | 2.192(4) | Mn(2)-O(6)  | 2.293(4) |
| Mn(2)-O(7)            | 2.220(5) | Mn(2)-O(8)  | 2.315(3) |
| Mn(2)-N(2b)           | 2.278(5) | Mn(2)-N(8a) | 2.283(5) |
| Mn(3)-O(8)            | 2.256(4) | Mn(3)-O(9)  | 2.195(3) |
| Mn(3)-O(9a)           | 2.243(4) | Mn(3)-O(10) | 2.180(4) |

|                   |            |                   |            |
|-------------------|------------|-------------------|------------|
| Mn(3)–O(11)       | 2.204(4)   | Mn(3)–N(7a)       | 2.280(4)   |
| Mn(3)–N(12a)      | 2.407(4)   |                   |            |
| <i>Angles</i>     |            |                   |            |
| O(1)-Mn(1)-O(2)   | 93.17(15)  | O(1)-Mn(1)-O(3)   | 95.34(15)  |
| O(1)-Mn(1)-O(4)   | 77.41(13)  | O(1)-Mn(1)-O(1b)  | 76.12 (14) |
| O(1)-Mn(1)-N(1b)  | 149.52(14) | O(1)-Mn(1)-N(6b)  | 144.55(14) |
| O(2)-Mn(1)-O(3)   | 171.46(16) | O(2)-Mn(1)-O(4)   | 88.07(17)  |
| O(2)-Mn(1)-O(1b)  | 85.57(16)  | O(2)-Mn(1)-N(1b)  | 85.57(16)  |
| O(2)-Mn(1)-N(6b)  | 89.37(16)  | O(3)-Mn(1)-O(4)   | 93.05(18)  |
| O(3)-Mn(1)-O(1b)  | 91.87(15)  | O(3)-Mn(1)-N(1b)  | 86.71(16)  |
| O(3)-Mn(1)-N(6b)  | 84.13(16)  | O(4)-Mn(1)-O(1b)  | 153.40(14) |
| O(4)-Mn(1)-N(1b)  | 72.12(15)  | O(4)-Mn(1)-N(6b)  | 138.03(15) |
| O(1b)-Mn(1)-N(1b) | 134.30(14) | O(1b)-Mn(1)-N(6b) | 68.49(14)  |
| N(1b)-Mn(1)-N(6b) | 65.92(15)  | O(4)-Mn(2)-O(5)   | 54.98(14)  |
| O(4)-Mn(2)-O(6)   | 140.79(14) | O(4)-Mn(2)-O(7)   | 90.3(2)    |
| O(4)-Mn(2)-O(8)   | 161.52(13) | O(4)-Mn(2)-N(2b)  | 76.64(14)  |
| O(4)-Mn(2)-N(8a)  | 85.57(16)  | O(5)-Mn(2)-O(6)   | 86.46(15)  |
| O(5)-Mn(2)-O(7)   | 90.7(2)    | O(5)-Mn(2)-O(8)   | 139.99(15) |
| O(5)-Mn(2)-N(2b)  | 131.40(15) | O(5)-Mn(2)-N(8a)  | 95.84(18)  |
| O(6)-Mn(2)-O(7)   | 82.63(19)  | O(6)-Mn(2)-O(8)   | 56.92(13)  |
| O(6)-Mn(2)-N(2b)  | 140.14(16) | O(6)-Mn(2)-N(8a)  | 107.42(17) |
| O(7)-Mn(2)-O(8)   | 99.06(19)  | O(7)-Mn(2)-N(2b)  | 84.70(19)  |
| O(7)-Mn(2)-N(8a)  | 168.29(19) | O(8)-Mn(2)-N(2b)  | 88.31(14)  |
| O(8)-Mn(2)-N(8a)  | 82.13(14)  | N(2b)-Mn(2)-N(8a) | 83.69(17)  |
| O(8)-Mn(3)-O(9)   | 78.48(13)  | O(8)-Mn(3)-O(9a)  | 149.33(13) |
| O(8)-Mn(3)-O(10)  | 80.86(14)  | O(8)-Mn(3)-O(11)  | 91.76(15)  |
| O(8)-Mn(3)-N(7a)  | 75.87(14)  | O(8)-Mn(3)-N(12a) | 140.04(13) |
| O(9)-Mn(3)-O(9a)  | 73.96(14)  | O(9)-Mn(3)-O(10)  | 99.16(15)  |
| O(9)-Mn(3)-O(11)  | 84.18(16)  | O(9)-Mn(3)-N(7a)  | 150.34(15) |

|                    |            |                    |            |
|--------------------|------------|--------------------|------------|
| O(9)-Mn(3)-N(12a)  | 141.19(15) | O(9a)-Mn(3)-O(10)  | 90.41(15)  |
| O(9a)-Mn(3)-O(11)  | 98.50(16)  | O(9a)-Mn(3)-N(7a)  | 150.34(15) |
| O(9a)-Mn(3)-N(12a) | 67.56(13)  | O(10)-Mn(3)-O(11)  | 171.06(16) |
| O(10)-Mn(3)-N(7a)  | 91.26(15)  | O(10)-Mn(3)-N(12a) | 86.24(15)  |
| O(11)-Mn(3)-N(7a)  | 81.98(16)  | O(11)-Mn(3)-N(12a) | 96.38(16)  |
| N(7a)-Mn(3)-N(12a) | 66.73(15)  |                    |            |

<sup>a</sup>1-x, 1-y, -z; <sup>b</sup>1-x, -y, 1-z

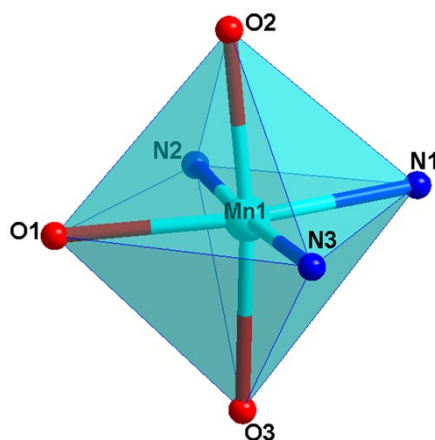

**Figure S1** Local coordination geometry of Mn(II) ion in complex **1**.

**Table S4** SHAPE analysis for complex **1**.

| Complex  | M          | PPY-6  | OC-6         | TPR-6  | JPPY-6 |
|----------|------------|--------|--------------|--------|--------|
| <b>1</b> | <b>Mn1</b> | 20.007 | <b>1.282</b> | 12.881 | 28.716 |

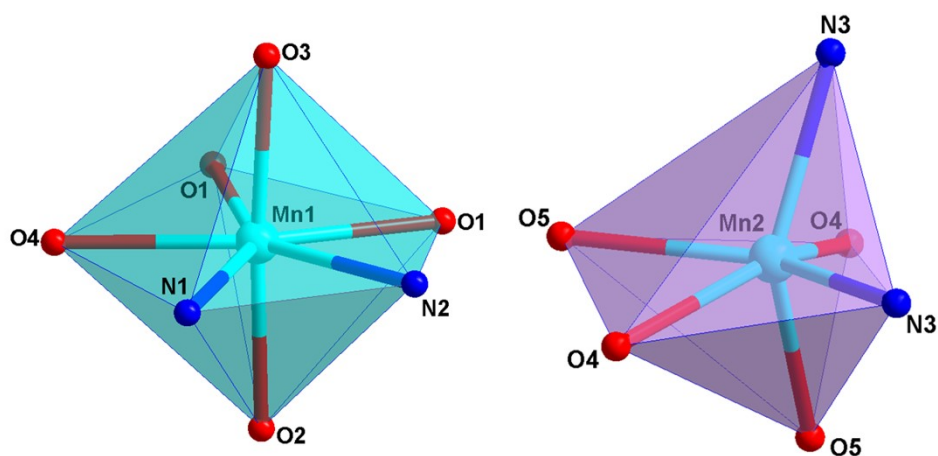

**Figure S2** Local coordination geometry of Mn(II) ions in complex **2**.

Table S5 SHAPE analysis for complex 2.

| Complex | M    | PBPY-7 | COC-7 | CTRR-7 | JPBPY  |
|---------|------|--------|-------|--------|--------|
| 2       | Mn 1 | 0.415  | 7.055 | 5.235  | 3.147  |
|         | Mn 2 | 20.007 | 1.282 | 12.881 | 28.716 |

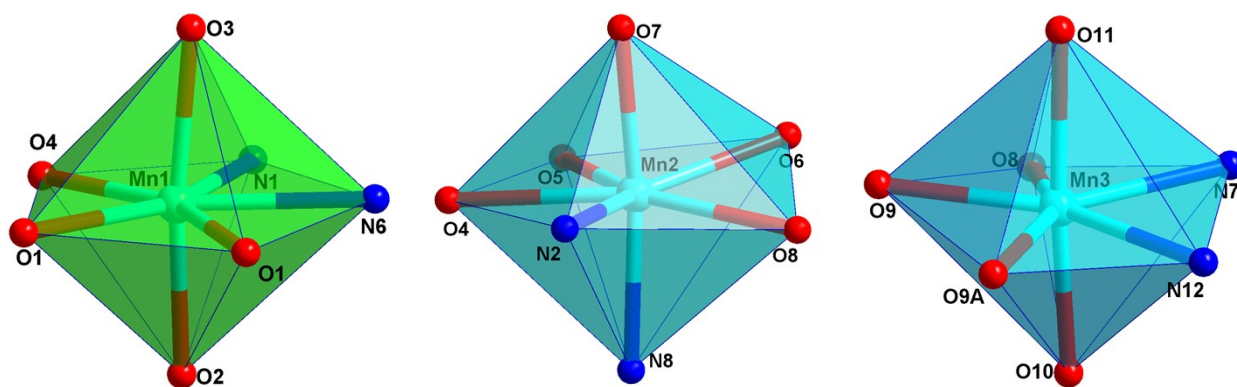

Figure S3 Local coordination geometry of Mn(II) ions in complex 3.

Table S6 SHAPE analysis for complex 3.

| Complex | M    | PBPY-7 | COC-7 | CTRR-7 | JPBPY-7 |
|---------|------|--------|-------|--------|---------|
| 3       | Mn 1 | 0.261  | 7.880 | 5.982  | 3.094   |
|         | Mn 2 | 2.652  | 5.882 | 4.656  | 5.916   |
|         | Mn 3 | 0.989  | 6.902 | 5.046  | 3.983   |

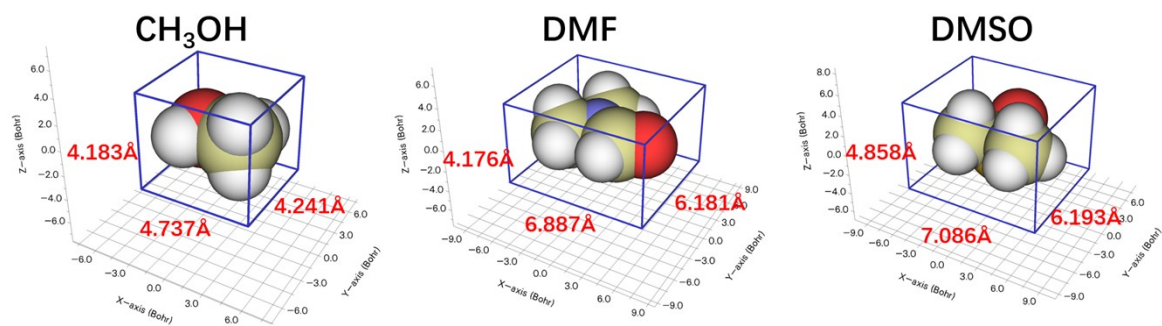

Figure S4 The size of CH<sub>3</sub>OH, DMF and DMSO.

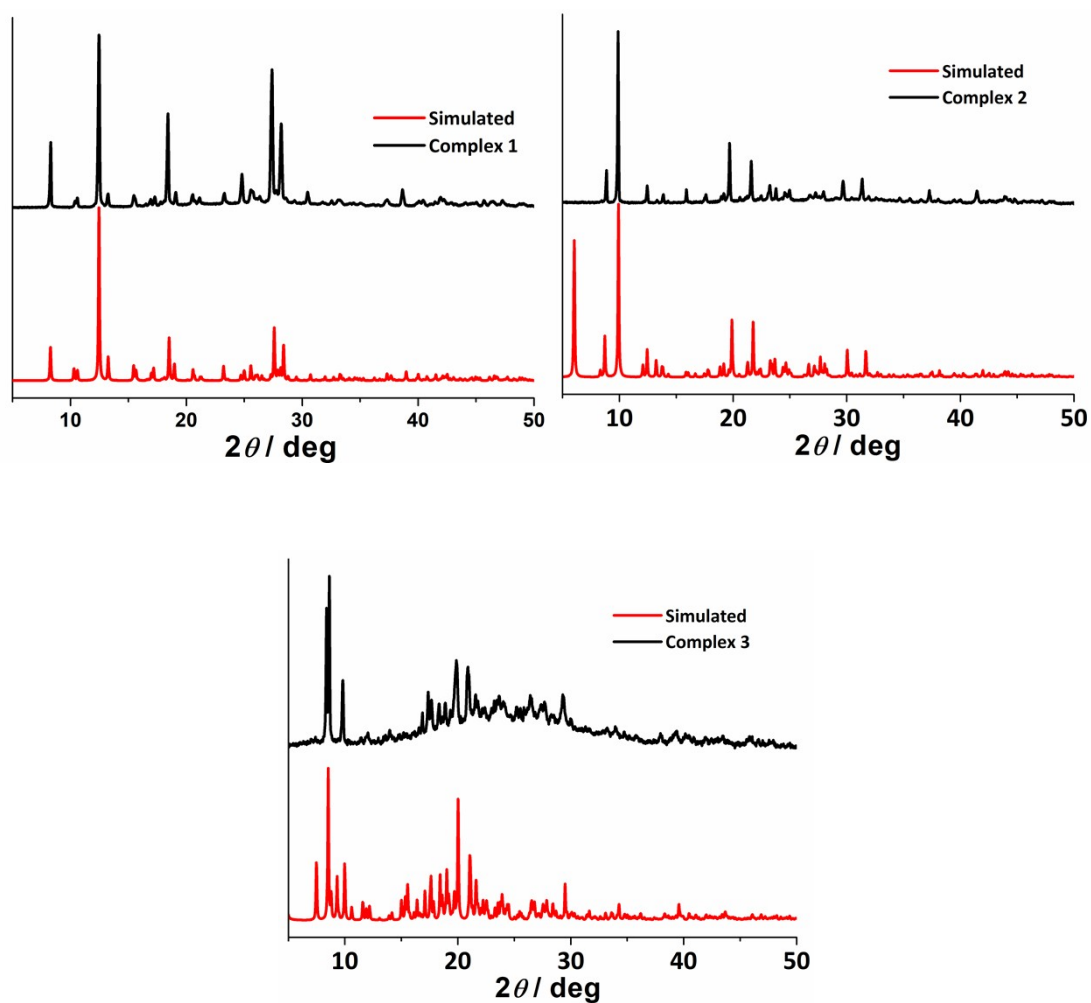

Figure S5 Powder X-ray diffraction (PXRD) patterns for complexes 1-3.



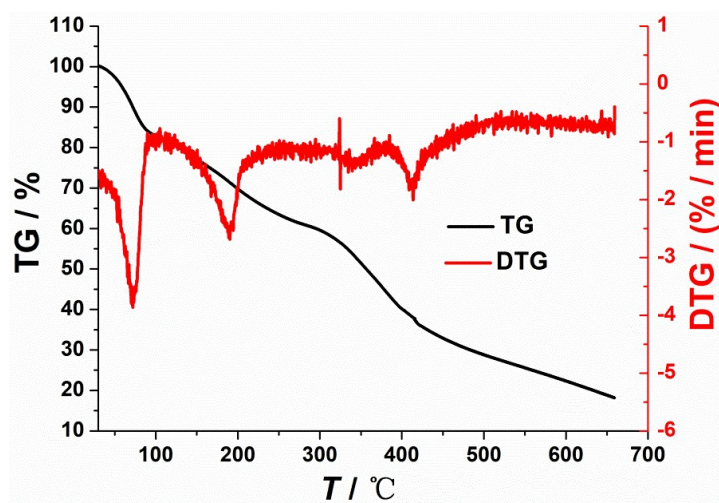

Figure S6 TG curves of complex 1 under N<sub>2</sub> atmosphere.

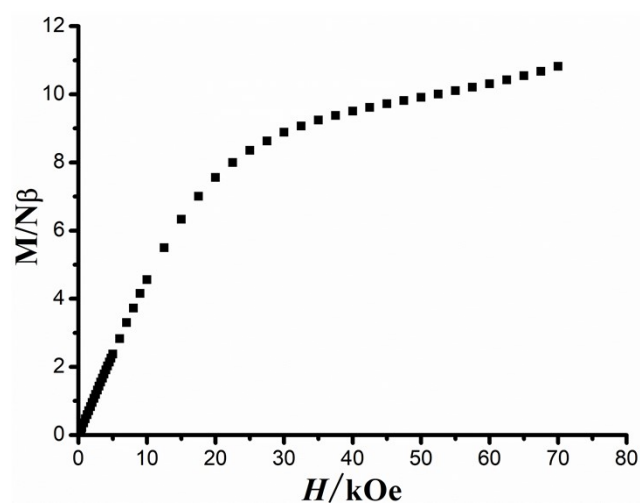

Figure S7  $M$  versus  $H$  plot at 2 K for complex 2.

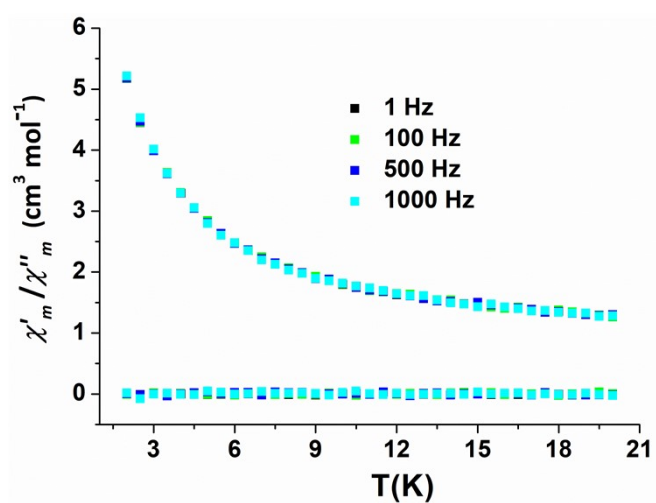

Figure S8 Temperature dependence of the in-phase and out-phase in zero field for complex 2.

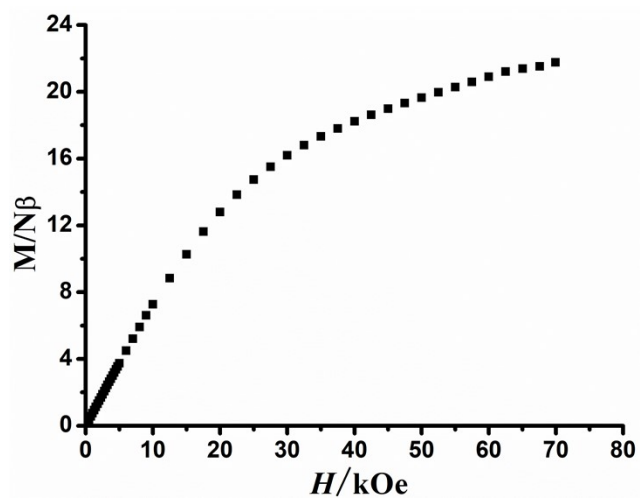

Figure S9  $M$  versus  $H$  plot at 2 K for complex 3.

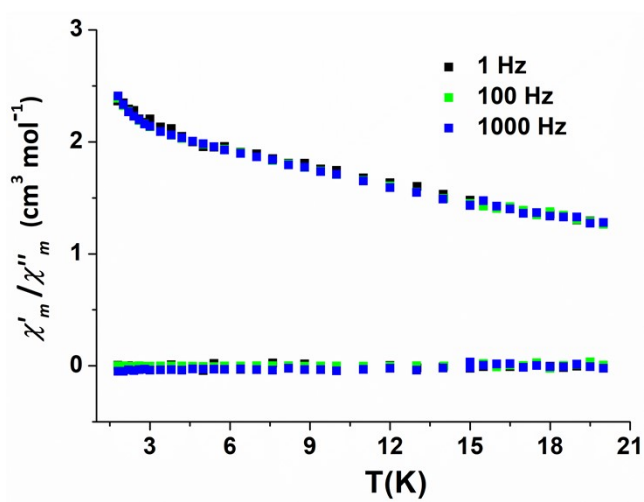

Figure S10 Temperature dependence of the in-phase and out-phase in zero field for complex 3.

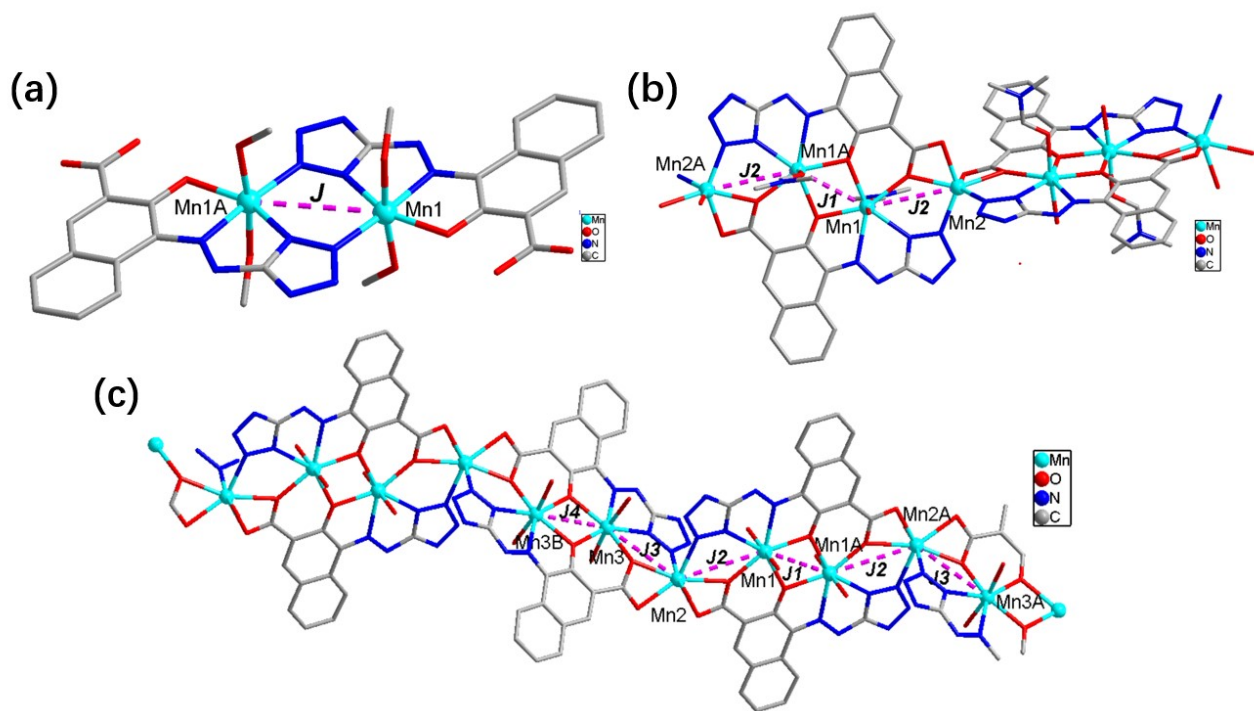

Figure S11 Magnetic exchange pathways between metal ions on the figure of X-ray structure in complexes 1-3.
